# Supplementary material for: TiO2-pillared clays with well-ordered porous structure and excellent photocatalytic activity
Source: Royal Society of Chemistry journal article supplement (doi:10.1039/c4ra12880j), 2014-12-15
Supplement: c4ra12880j1.pdf [file c4ra12880j1.pdf]

## Supplementary Information

### **TiO<sub>2</sub>-pillared Clays with Well-ordered Porous Structure and Excellent their Photocatalytic Activity**

Jae-Hun Yang,<sup>a</sup> Huiyan Piao,<sup>a</sup> Ajayan Vinu,<sup>b</sup> Ahmed A.Elzatahry,<sup>c,e</sup> Seung-Min Paek,<sup>d</sup> Jin-Ho Choy<sup>\*,a,b,c</sup>

<sup>a</sup>Center for Intelligent Nano-Bio Materials (CINBM), Department of Chemistry and Nano Science, Ewha Womans University, Seoul 120-750, Republic of Korea. Email: [jhchoy@ewha.ac.kr](mailto:jhchoy@ewha.ac.kr)

<sup>b</sup>Australian Institute for Bioengineering and Nanotechnology, The University of Queensland, Brisbane 4073, QLD, Australia.

<sup>c</sup>Department of Chemistry, King Saud University, B.O. BOX.2455, Riaydh 11451, Saudi Arabia.

<sup>d</sup>Department of Chemistry and Green-Nano Materials Research Center, Kyungpook National University, Taegu 702-701, Republic of Korea.

<sup>d</sup>Department of Chemistry and Green-Nano Materials Research Center, Kyungpook National University, Taegu 702-701, Republic of Korea.

<sup>e</sup>Department of Chemistry and Earth Sciences, College of Arts and Sciences, Qatar University P.O. Box 2713, Doha, Qatar

## Experimental

### Materials

The synthetic Na-fluoromica (denoted as Na-mica) with a chemical formula of  $\text{Na}_{0.7}\text{Mg}_{2.65}\text{Si}_4\text{O}_{10}\text{F}_2$  and the natural Na-montmorillonite (Kunipia-G) with a chemical formula of  $\text{Na}_{0.35}\text{K}_{0.01}\text{Ca}_{0.02}(\text{Si}_{3.89}\text{Al}_{0.11})(\text{Al}_{1.60}\text{Mg}_{0.32}\text{Fe}_{0.08})\text{O}_{10}(\text{OH})_2$  were purchased from CO-OP Chemical Co. Ltd. and Kunimine Industries Co. Ltd., respectively, and used as the host for pillaring  $\text{TiO}_2$  nanoparticles without any purification. Magnesium chloride hexahydrate ( $\text{MgCl}_2 \cdot 6\text{H}_2\text{O}$ , 98%), iron(II) chloride ( $\text{FeCl}_2$ , 98%), and titanium tetraisopropoxide (97%,  $\text{Ti}(\text{OCH}(\text{CH}_3)_2)_4$ ) were purchased from Sigma-Aldrich. Hydrochloric acid was purchased from Daejung Chemical and Metals. All the chemicals were used without any further purification.

### Synthesis of Materials

**Clays with different optical transparency.** Based on the Hoffman-Klemen effect, optical transparency and cation exchange capacity of the pristine clay were carefully controlled. Briefly, 5 g of Na-mica dispersed in 400 mL of deionized water was mixed with 0.5 mmol of  $\text{MgCl}_2$  and  $\text{FeCl}_2$ , respectively, and each suspension was stirred at room temperature for 20 h. The partially exchanged Na-mica with  $\text{Mg}^{2+}$  or  $\text{Fe}^{2+}$  was separated by the centrifugation and thoroughly washed with deionized water until chloride ions in the supernatant were not be detected. Thus, the as-prepared samples were freeze-dried and finally calcined at 550 °C for 4 h in order to fix the  $\text{Mg}^{2+}$  or  $\text{Fe}^{2+}$  ions into the vacant octahedral sites in-plane of the clay lattice. The resulting samples with different transparency were denoted as MgM and FeM, respectively. The cationic exchange capacities of the as-prepared MgM and FeM and the pristine clays, Na-mica and Kunipia-G, were evaluated by the methylene blue method.<sup>s1</sup>

**Clays with different porosity.**  $\text{TiO}_2$ -pillared clays were synthesized via ion-exchange reaction and subsequent calcination (pillaring) as described previously by Yamanaka *et al.*<sup>s2</sup> At first, 2 g of each clay with different transparency (Na-mica, MgM, FeM and Kunipia-G) was dispersed in 200 mL deionized water and swelled for 12 h prior to ion-exchange reaction. We prepared  $\text{TiO}_2$  oligomeric cations via the acid catalyzed hydrolysis based on Yamanaka's,<sup>s2</sup> where titanium isopropoxide was hydrolyzed and peptized with 1 N HCl (aq) to form the oligomeric cations ( $\text{TiO}_2$  nanosol). The most important synthetic parameter for preparing  $\text{TiO}_2$  nanosol with homogeneous size and charge was the ratio of HCl/Ti, which should be not less than 2. Under this condition, the hydrolyzed white slurry was transformed into a clear sol within 1 hour. In this study, titanium tetraisopropoxide was dropwisely added into 1 M HCl solution with HCl/Ti molar ratio of 2 and peptized at room temperature for 1 h and filtered with 0.2  $\mu\text{m}$  PTEF membrane filter. The resulting  $\text{TiO}_2$  nanosol was slowly added to 1 wt% aqueous suspension of clays with Ti/CEC ratio of 40, and ion-exchange reaction was carried out at 50 °C for 3 h. The resulting products were separated by centrifugation and washed with deionized water several times to remove the excess  $\text{TiO}_2$  sol particles and chloride ions. The resulting  $\text{TiO}_2$ -pillared mica,  $\text{TiO}_2$ -pillared MgM,  $\text{TiO}_2$ -pillared FeM, and  $\text{TiO}_2$ -pillared Kunipia-G with different porosity were freeze-dried and calcined in the temperature range of 100–800 °C for 3 h (hereafter denoted as TM-X, TMgM-X, TFeM-X, and TK-X, where X is the calcination temperature).

### Characterization

X-ray diffraction (XRD) patterns for all the samples were recorded using a Rigaku RINT-Ultima III diffractometer equipped with Ni-filtered Cu-K $\alpha$  radiation ( $\lambda = 1.5405 \text{ \AA}$ ) operated at 40 kV and 30 mA. The diffuse reflectance UV-vis spectra were measured using a Jasco V-550 spectrophotometer equipped with an integrating sphere by using  $\text{BaSO}_4$  plate as the baseline. Transmission electron microscopy (TEM) images were obtained using a JEOL JEM-2100F HRTEM at an accelerating voltage of 200 kV. Cross-sectioned samples for the TEM analysis were prepared using a RMC Ultramicrotome (PowerTome PC), in which sectioning was conducted at RT with the thickness of 80 nm and speed of 0.5 mm/min.  $\text{N}_2$  adsorption-desorption isotherms were volumetrically measured at liquid nitrogen temperature (77 K) using a Belsorp-Mini II (Bel Japan, Inc.). All the samples were degassed at 200 °C for 3 h under vacuum ( $< 10^{-2}$  torr) prior to the measurement. The chemical compositions were determined by measuring the X-ray fluorescence spectra for the pellet samples using a ZSX Primus II (wavelength dispersive type XRF instrument, Rigaku). The chemical analysis results were listed in Table S1 of the supporting information (ESI†). X-ray absorption spectroscopic (XAS) experiments at the Ti K-edge were performed using an X-ray absorption fine structure (XAFS) facility installed at beam line 10C in Pohang Accelerator Laboratory (PAL), Korea. XAS data were collected at room temperature in the transmission mode using gas-ionization detectors. All the spectra of Ti K-edge were calibrated by measuring the spectrum of Ti metal foil, simultaneously together with those of the samples. A Si(111) double crystal monochromator (DCM) was employed to monochromatize the X-ray photon energy. A step size of 0.2 eV in the X-ray absorption near edge structure (XANES) region was used to accurately collect XANES spectra. Data analyses for the experimental spectra were carried out by the standard procedure as reported previously.<sup>s3</sup> On the other hand, the extended X-ray absorption fine structure (EXAFS) analyses were also conducted by using the UWXAFS 2.0 code.<sup>s4</sup>

### Photocatalytic activity test

Photocatalytic activity for all the samples was evaluated by the photodecomposition of methyl orange (MO) in a solution under UV light. Briefly, 30 mg of the samples were dispersed in 30 mL of an aqueous solution ( $5 \times 10^{-5}$  M) of MO contained in a Pyrex glass vessel and the suspension was stirred for 30 min in the dark. 300 W Xe arc lamp was used and equipped with water filter to remove the infrared irradiation. The integrated light intensity between 290 nm and 800 nm was  $\sim 0.1$  W/cm<sup>2</sup>. The concentration of MO was determined by monitoring the absorbance at 464 nm ( $\lambda_{\text{max}}$  of MO) using a Perkin-Elmer Lambda 35 spectrophotometer.

### References

- S1 G. Kahr and F.T. Madsen, *Appl. Clay Sci.*, 1995, **9**, 327-336.
- S2 (a) S. Yamanaka, T. Nishihara and M. Hattori, *Mater. Chem. Phys.*, 1987, **17**, 87; (b) S. Yamanaka and K. C. Makita, *J. Porous Mater.*, 1995, **1**, 29.
- S3 J. H. Park, J. H. Yang, J. B. Yoon, S. J. Hwang and J. H. Choy, *J. Phys. Chem. B*, 2006, **110**, 1592-1598.
- S4 S. M. Paek, H. Jung, M. Park, J. K. Lee and J. H. Choy, *Chem. Mater.*, 2005, **17**, 3492-3498.

**Table S1.** Chemical composition of TiO<sub>2</sub>-pillared clays and host clays obtained by XRF (x-ray fluorescence) analysis.

| Samples   | Chemical composition (wt%) |       |                                |                  |                                |                  |
|-----------|----------------------------|-------|--------------------------------|------------------|--------------------------------|------------------|
|           | Na <sub>2</sub> O          | MgO   | Al <sub>2</sub> O <sub>3</sub> | SiO <sub>2</sub> | Fe <sub>2</sub> O <sub>3</sub> | TiO <sub>2</sub> |
| Kunipia-G | 2.67                       | 2.53  | 24.96                          | 67.00            | 2.85                           | -                |
| Na-Mica   | 4.36                       | 23.40 | -                              | 70.62            | -                              | -                |
| MgM       | 3.30                       | 24.84 | -                              | 71.12            | -                              | -                |
| FeM       | 3.67                       | 24.30 | -                              | 70.64            | 1.28                           | -                |
| TM-500    | 1.32                       | 16.22 | -                              | 46.73            | -                              | 34.96            |
| TMgM-500  | 1.12                       | 17.76 | -                              | 48.99            | -                              | 31.93            |
| TFeM-500  | 1.46                       | 16.72 | -                              | 48.30            | 0.63                           | 32.28            |
| TK-500    | -                          | 1.24  | 11.18                          | 29.26            | 1.16                           | 56.90            |

**Table S2.** Porous texture of TiO<sub>2</sub> pillared layered silicates and host layered silicates.

| Samples   | S <sub>BET</sub> (m <sup>2</sup> /g) | V <sub>tot</sub> (ml/g) | V <sub>micro</sub> (ml/g) |
|-----------|--------------------------------------|-------------------------|---------------------------|
| Na-Mica   | 9                                    | 0.03                    | -                         |
| Kunipia-G | 5                                    | 0.01                    | -                         |
| TM-500    | 242 (0.999)                          | 0.21                    | 0.10                      |
| TK-500    | 314 (0.999)                          | 0.25                    | 0.14                      |
| TFeM-500  | 347 (0.997)                          | 0.27                    | 0.15                      |
| TMgM-300  | 299 (0.998)                          | 0.25                    | 0.12                      |
| TMgM-400  | 376 (0.997)                          | 0.30                    | 0.16                      |
| TMgM-500  | 335 (0.997)                          | 0.29                    | 0.15                      |
| TMgM-600  | 266 (0.998)                          | 0.26                    | 0.11.                     |
| TMgM-700  | 250 (0.999)                          | 0.26                    | 0.10                      |
| TMgM-800  | 16 (1.000)                           | 0.10                    | -                         |

\*S<sub>BET</sub> : BET specific surface area, V<sub>tot</sub> : total volume, V<sub>micro</sub> : micropore volume calculated by t-plot.

The value in ( ) is a correlation factor of BET equation.

**Table S3.** Results of nonlinear least-squares curve-fitting analysis for the Ti K-edge EXAFS spectra of TiO<sub>2</sub>-Pillared clays and anatase TiO<sub>2</sub>.

| Samples                  | Bond                    | CN  | R    | $\Delta E_0$ | $\sigma^2$ |
|--------------------------|-------------------------|-----|------|--------------|------------|
| Anatase TiO <sub>2</sub> | Ti–O                    | 6.0 | 1.95 | 0.51         | 4.9        |
|                          | Ti–Ti <sub>edge</sub>   | 4.0 | 3.04 | -0.47        | 5.1        |
|                          | Ti–Ti <sub>corner</sub> | 4.0 | 3.79 | 1.12         | 6.3        |
| TM-500                   | Ti–O                    | 5.6 | 1.96 | 4.42         | 6.1        |
|                          | Ti–Ti <sub>edge</sub>   | 2.4 | 3.05 | 3.08         | 6.8        |
|                          | Ti–Ti <sub>corner</sub> | 2.6 | 3.84 | 3.28         | 7.8        |
| TMgM-500                 | Ti–O                    | 5.7 | 1.98 | 4.91         | 6.9        |
|                          | Ti–Ti <sub>edge</sub>   | 3.0 | 3.07 | -0.38        | 9.9        |
|                          | Ti–Ti <sub>corner</sub> | 2.9 | 3.85 | 1.47         | 10.3       |
| TFeM-500                 | Ti–O                    | 5.5 | 1.97 | 4.78         | 6.8        |
|                          | Ti–Ti <sub>edge</sub>   | 2.9 | 3.03 | 0.30         | 9.1        |
|                          | Ti–Ti <sub>corner</sub> | 3.0 | 3.80 | 2.71         | 8.4        |

\*The fitting range for  $k$  is 2.62-12.90 Å<sup>-1</sup>, and that for  $R$  is 1.00-3.85 Å. Errors in  $CN$  (coordination number) and  $\sigma^2$  (Debye-Waller factor, 10<sup>-3</sup> Å<sup>2</sup>) are 20%, and those in  $R$  (interatomic distance) and  $\Delta E_0$  (threshold energy difference) are 0.02 Å and 2.0 eV, respectively.

## Scheme S1

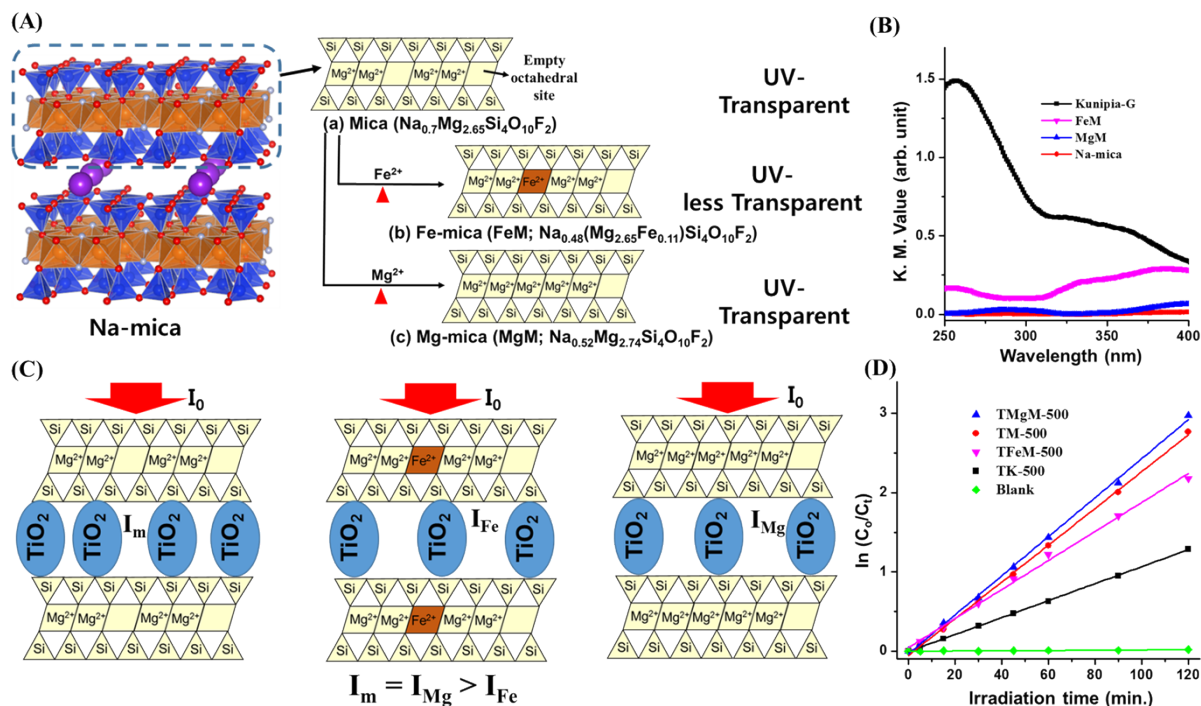

**Scheme S1.** (A) Structure of Na-mica and modified micas (FeM and MgM), (B) UV-vis spectra of Na-mica, modified micas and Kunipia-F (natural montmorillonites), (C) their schematic TiO<sub>2</sub> pillared structures and (D) time-dependent curves of the concentration of methyl orange (MO) upon photocatalytic degradation reaction under UV irradiation ( $\lambda > 290 \text{ nm}$ ) with and without TiO<sub>2</sub> pillared clays.

**Fig. S1.**

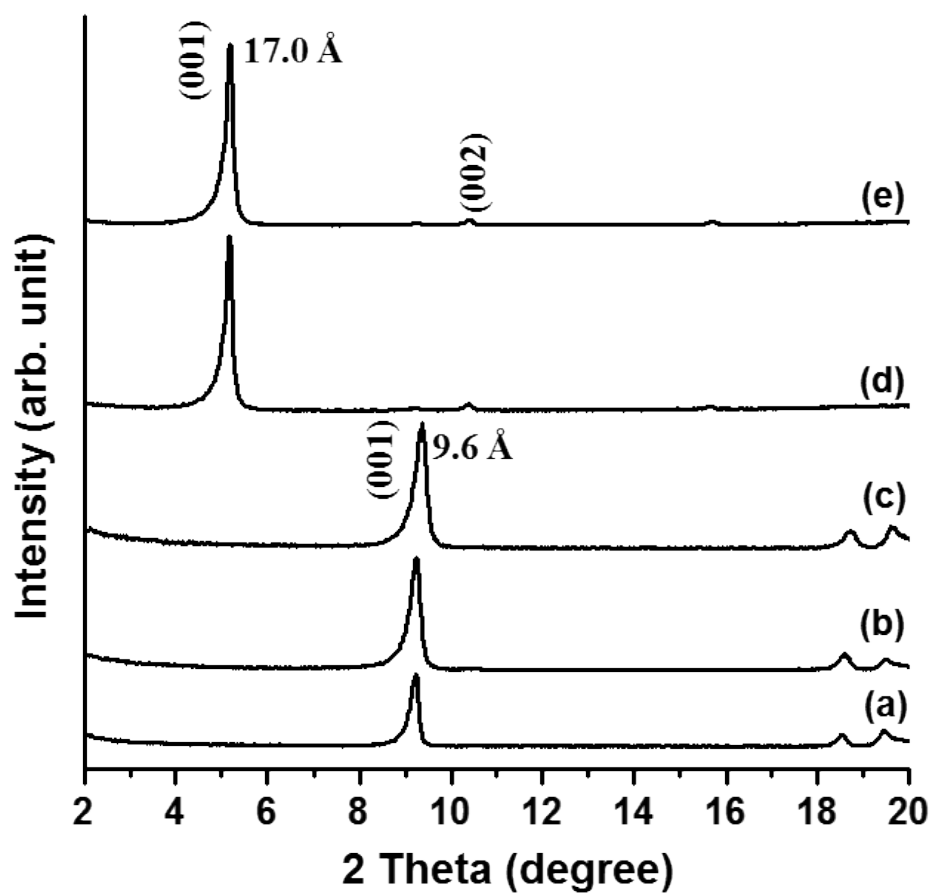

**Fig. S1** X-ray diffraction patterns of (a) Na-mica, (b)  $\text{Mg}^{2+}$  modified Na-mica (MgM), (c)  $\text{Fe}^{2+}$  modified Na-mica (FeM), (d) ethylene glycol (EG) intercalated MgM and (e) EG intercalated FeM.

**Fig. S2**

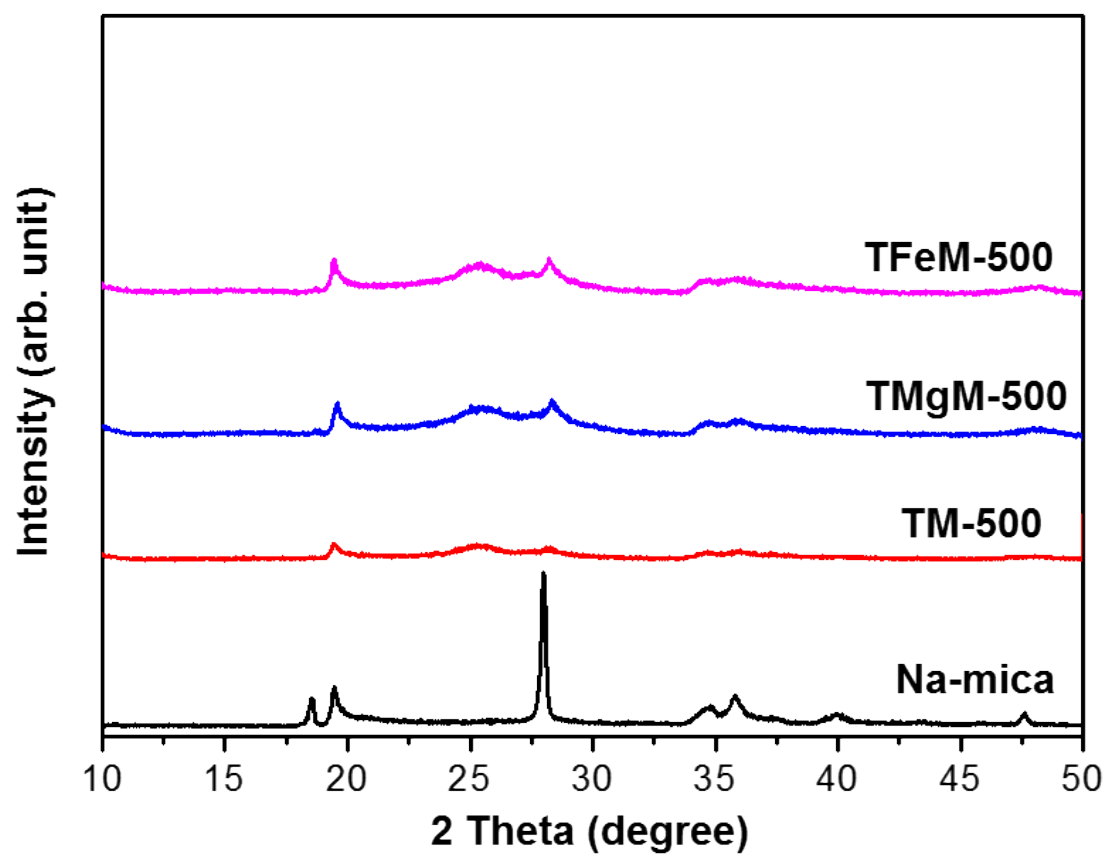

**Fig. S2** Wide angle X-ray diffraction patterns of (a) Na-mica, (b) TM-500, (c) TMgM-500 and (d) TFeM-500.
